# Supplementary material
Source: PubMed Central journal article supplement (PMC2910386)

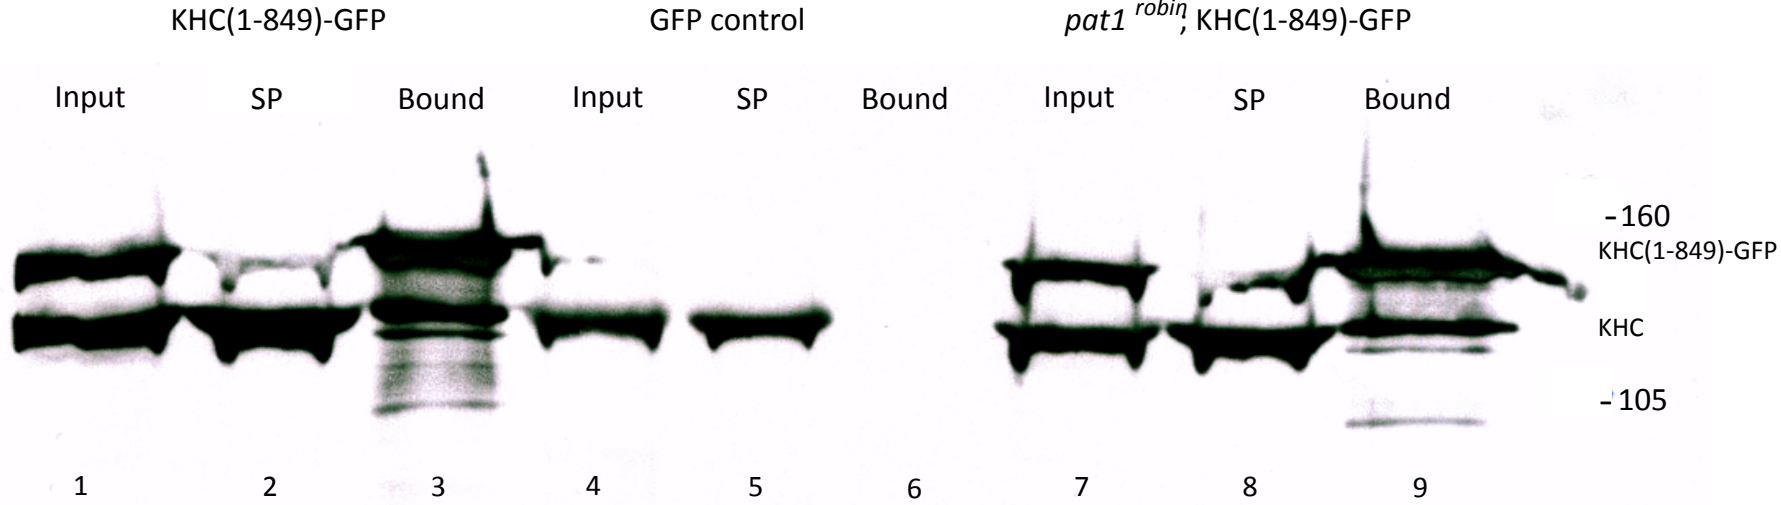

Immunoprecipitation:  $\alpha$ -GFP Ab  
 Western blot:  $\alpha$ -KHC Ab

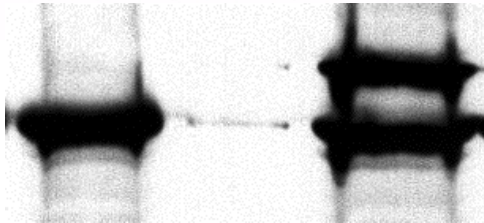

Immunoprecipitation:  $\alpha$ -GFP Ab  
 Western blot:  $\alpha$ -GFP Ab

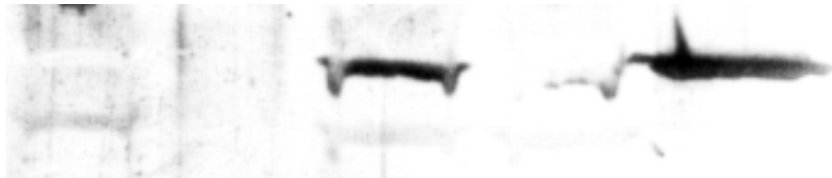

Supplement: supp_dev.048108_048108FigS3.pdf [file supp_dev.048108_048108FigS3.pdf]
