# Supplementary material
Source: PubMed Central journal article supplement (PMC2910386)
Supplement: supp_dev.048108_048108FigS6.pdf [file supp_dev.048108_048108FigS6.pdf]

A

*khc<sup>23</sup>*

Staufen

DAPI

*khc<sup>17</sup>*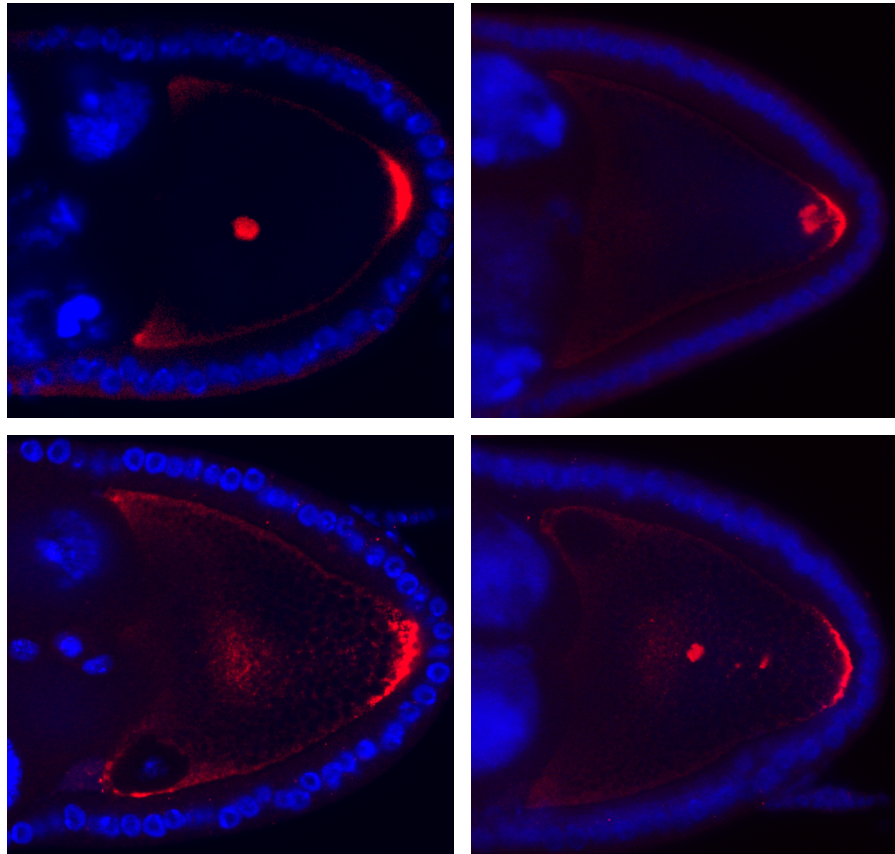

B ::

| Genotype                                             | Staufen mislocalization phenotype at stage 9 (dots and clouds) | Percentage of Staufen mislocalized oocytes with only dots |
|------------------------------------------------------|----------------------------------------------------------------|-----------------------------------------------------------|
| <i>khc<sup>23</sup></i> germline clones              | 41 % (n=49)                                                    | 75% (n=20)                                                |
| <i>khc<sup>17</sup></i> germline clones              | 61 % (n=23)                                                    | 43% (n=14)                                                |
| <i>khc<sup>17</sup> /+</i>                           | 10 % (n=40)                                                    |                                                           |
| <i>KHC(1-849)/+;khc<sup>17</sup></i> germline clones | 94 % (n=32)                                                    | 60% (n=30)                                                |
