# Supplementary material
Source: PubMed Central journal article supplement (PMC2910386)
Supplement: supp_dev.048108_048108FigS8.pdf [file supp_dev.048108_048108FigS8.pdf]

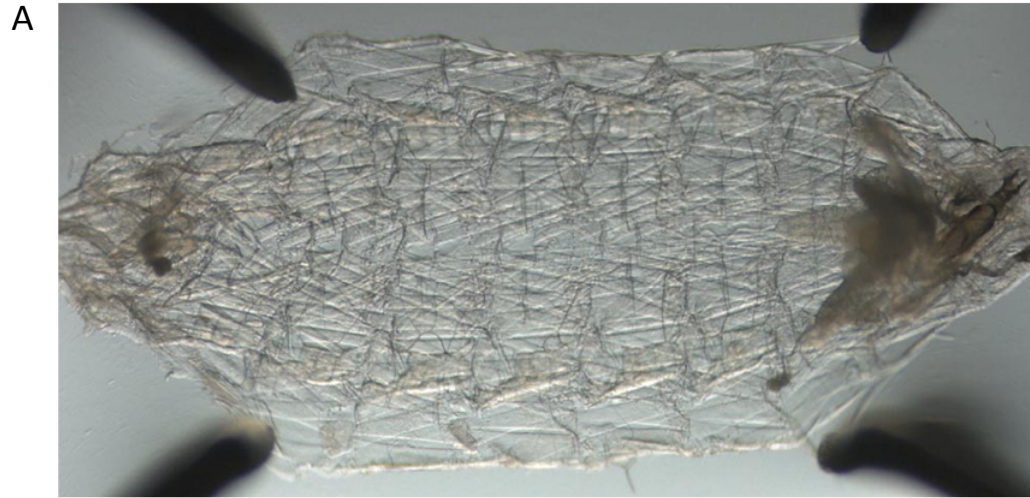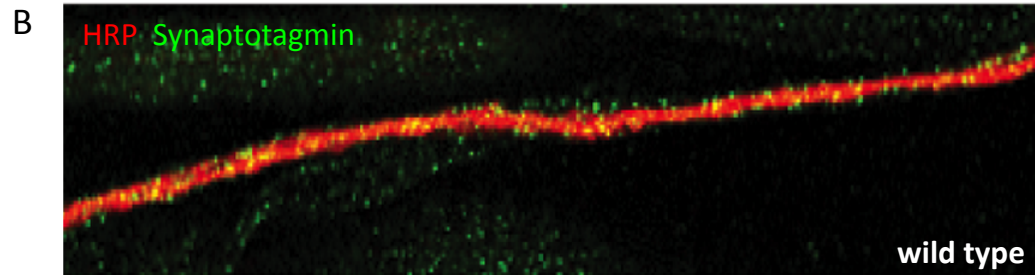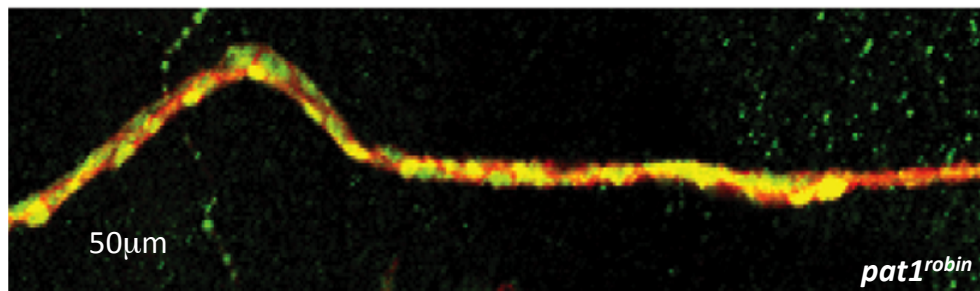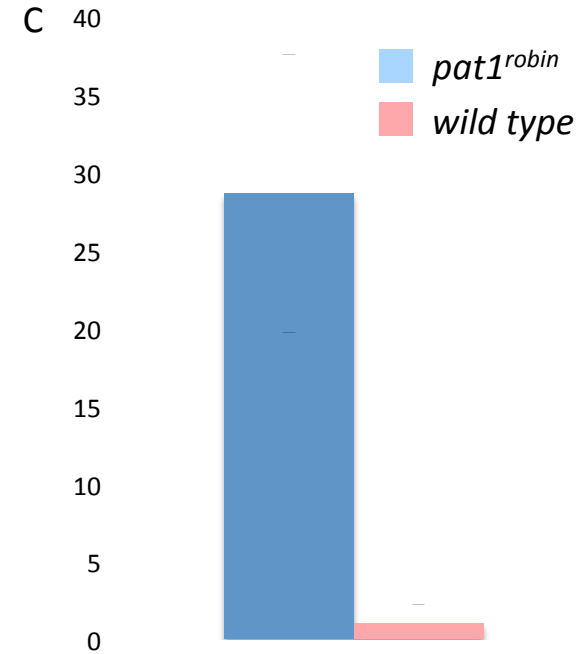

Number of synaptotagmin clogs per 200µm of an axon. Six segments of 200µm were analysed per larvae (red boxes in A). This graphic shows the average number from eight larvae per genotype. Only clogs bigger than 3µm were counted.
