# Supplementary material
Source: PubMed Central journal article supplement (PMC2910386)
Supplement: supp_dev.048108_DEV048108TableS1.pdf [file supp_dev.048108_DEV048108TableS1.pdf]

**Table S1. Rescue of *Pat1* mutant phenotype by expression of PAT1 or KLC**

| Genotype                                                 | Staufen mislocalization phenotype at stage 9 | Two-tailed <i>P</i> -value upon comparison with <i>Pat1</i> |
|----------------------------------------------------------|----------------------------------------------|-------------------------------------------------------------|
| <i>Pat1</i>                                              | 27.5% ( <i>n</i> =64)                        | –                                                           |
| <i>Pat1; maternal <math>\alpha</math>-4-tubulin-Pat1</i> | 7.7% ( <i>n</i> =78)                         | 0.0015                                                      |
| <i>Pat1; GEN-KLC</i>                                     | 6.4% ( <i>n</i> =47)                         | 0.006                                                       |

Quantification of the Staufen mislocalization phenotype in various stage 9 oocytes. The ectopic mislocalization of Staufen in *Pat1* mutants is rescued by the expression of *Pat1* in the germline (*Pat1; maternal  $\alpha$ -4-tubulin-Pat1*), as well as by the expression of a genomic-KLC transgene (*Pat1; GEN-KLC*).
