# Supplementary material
Source: PubMed Central journal article supplement (PMC2910386)
Supplement: supp_dev.048108_DEV048108TableS2.pdf [file supp_dev.048108_DEV048108TableS2.pdf]

**Table S2. Increasing and decreasing the KHC dosage respectively reduces and enhances the Staufen mislocalization defects in KHC(1-849) flies**

| Genotype                                                                        | Staufen mislocalization phenotype at stage 9                                                         | Two-tailed <i>P</i> -value upon comparison with <i>yw</i> |
|---------------------------------------------------------------------------------|------------------------------------------------------------------------------------------------------|-----------------------------------------------------------|
| <i>yw</i>                                                                       | 8.9% ( <i>n</i> =45)                                                                                 | –                                                         |
| <i>FRTG13 Khc<sup>27</sup>/+</i>                                                | 18.9% ( <i>n</i> =53)                                                                                | 0.2467                                                    |
| <i>KHC<sup>1-849</sup>GFP/KHC<sup>1-849</sup>GFP</i>                            | 54.8% ( <i>n</i> =73)                                                                                | <0.0001                                                   |
| <i>KHC<sup>1-849</sup>GFP/KHC<sup>1-849</sup>GFP; FRTG13 Khc<sup>27</sup>/+</i> | 70.9% ( <i>n</i> =55)                                                                                | <0.0001                                                   |
| <i>KHC<sup>1-849</sup>GFP/KHC<sup>1-849</sup>GFP; KHC<sup>1-975</sup>/+</i>     | 36.2% ( <i>n</i> =58)                                                                                | 0.0012                                                    |
| Genotype                                                                        | Two-tailed <i>P</i> -value upon comparison with <i>KHC<sup>1-849</sup>GFP/KHC<sup>1-849</sup>GFP</i> |                                                           |
| <i>KHC<sup>1-849</sup>GFP/KHC<sup>1-849</sup>GFP; FRTG13 Khc<sup>27</sup>/+</i> | 0.0402                                                                                               |                                                           |
| <i>KHC<sup>1-849</sup>GFP/KHC<sup>1-849</sup>GFP; KHC<sup>1-975</sup>/+</i>     | 0.0367                                                                                               |                                                           |

*KHC(1-849)-GFP* homozygous flies have a statistically significant Staufen mislocalization phenotype when compared with control flies (*yw*). Removing a copy of endogenous *Khc* (*FRTG13 Khc<sup>27</sup>/+*) significantly strengthens this phenotype, whereas adding an extra copy of full-length *Khc* (*KHC1-975*) significantly weakens this phenotype.
