# Supplementary material
Source: PubMed Central journal article supplement (PMC2910386)

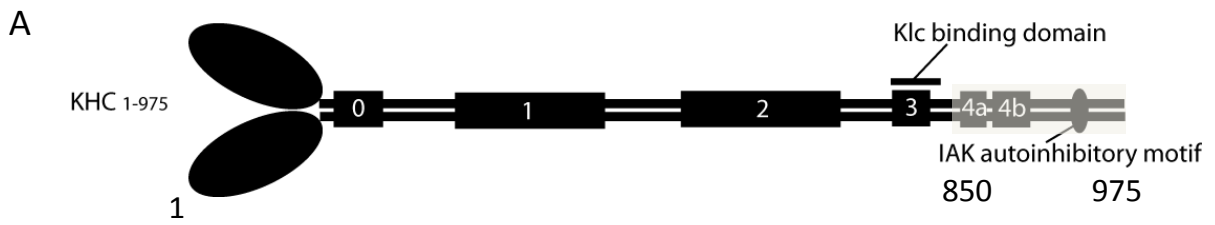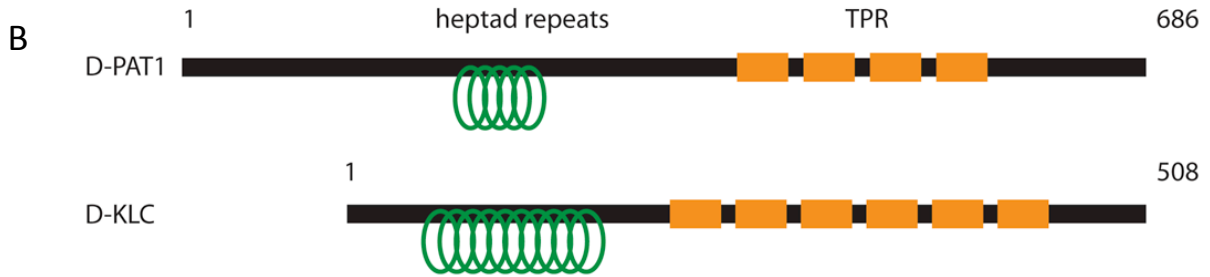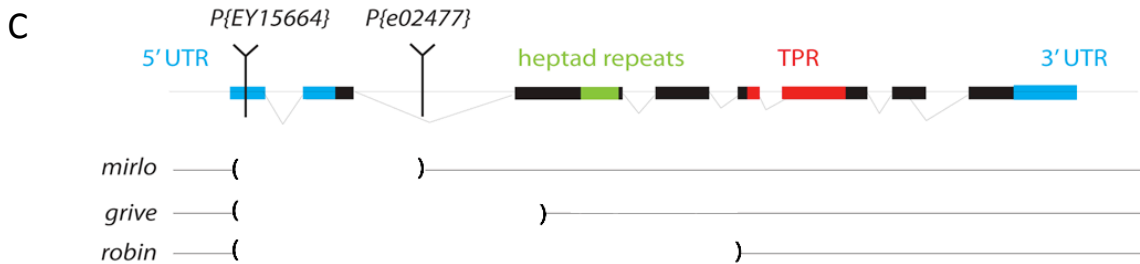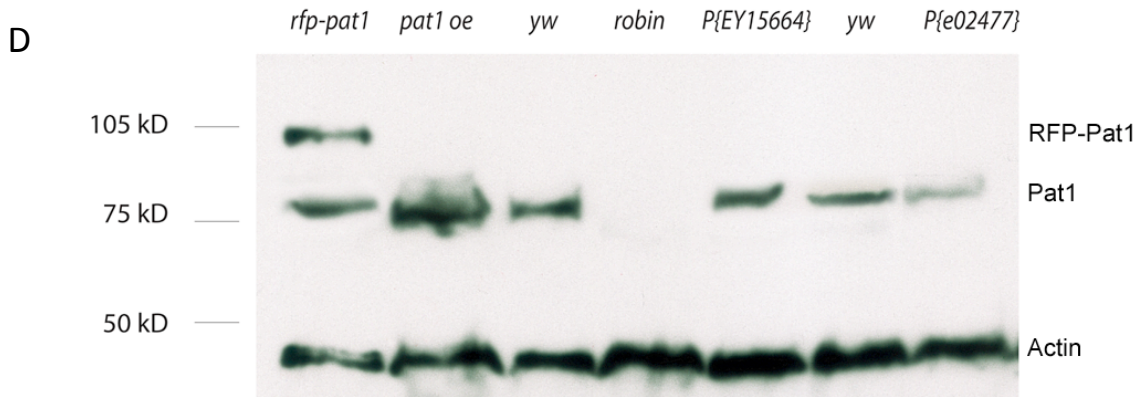

Supplement: supp_dev.048108_048108FigS1.pdf [file supp_dev.048108_048108FigS1.pdf]

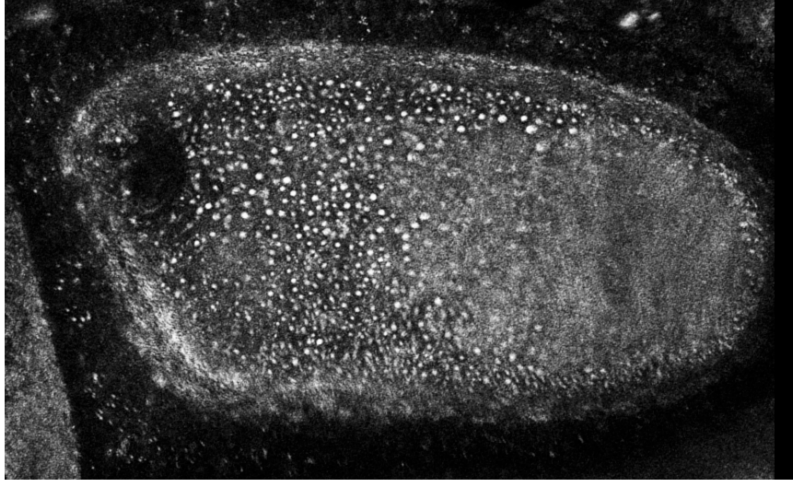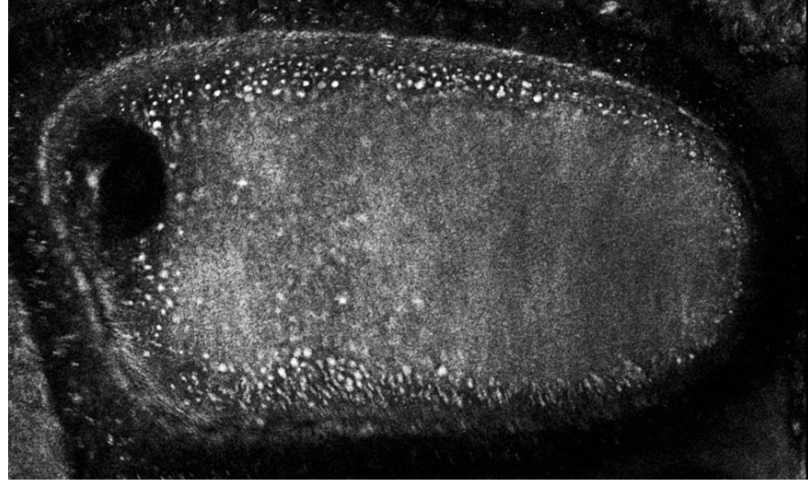

*wt*

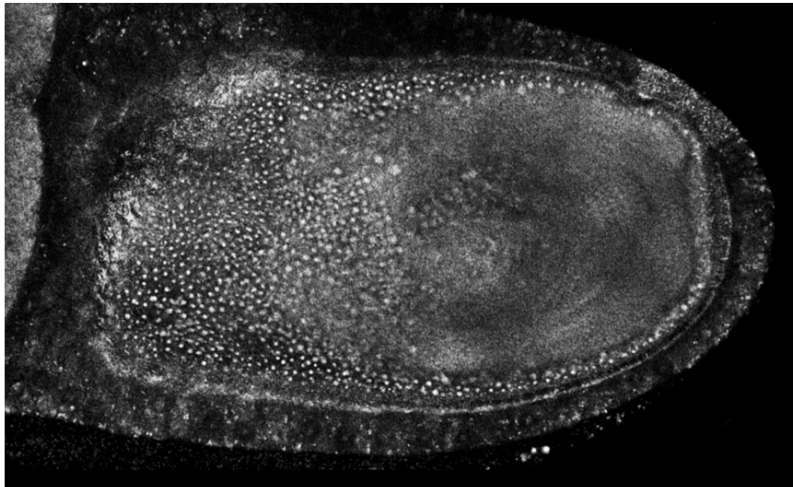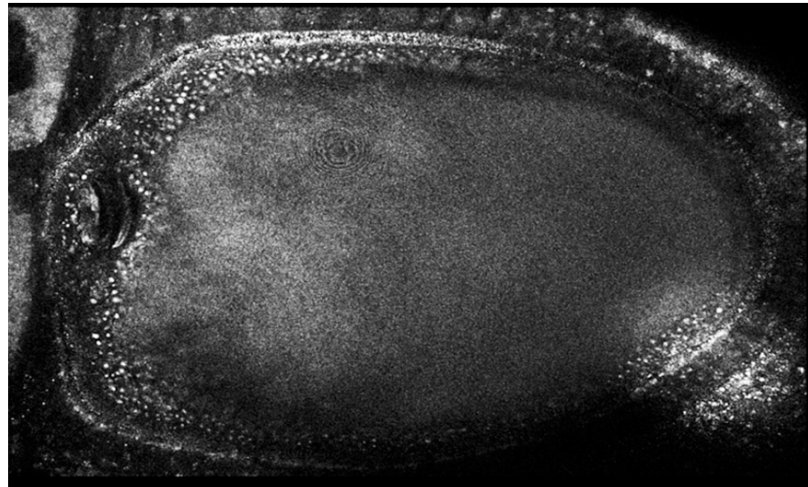

*pat1*

Supplement: supp_dev.048108_048108FigS2.pdf [file supp_dev.048108_048108FigS2.pdf]

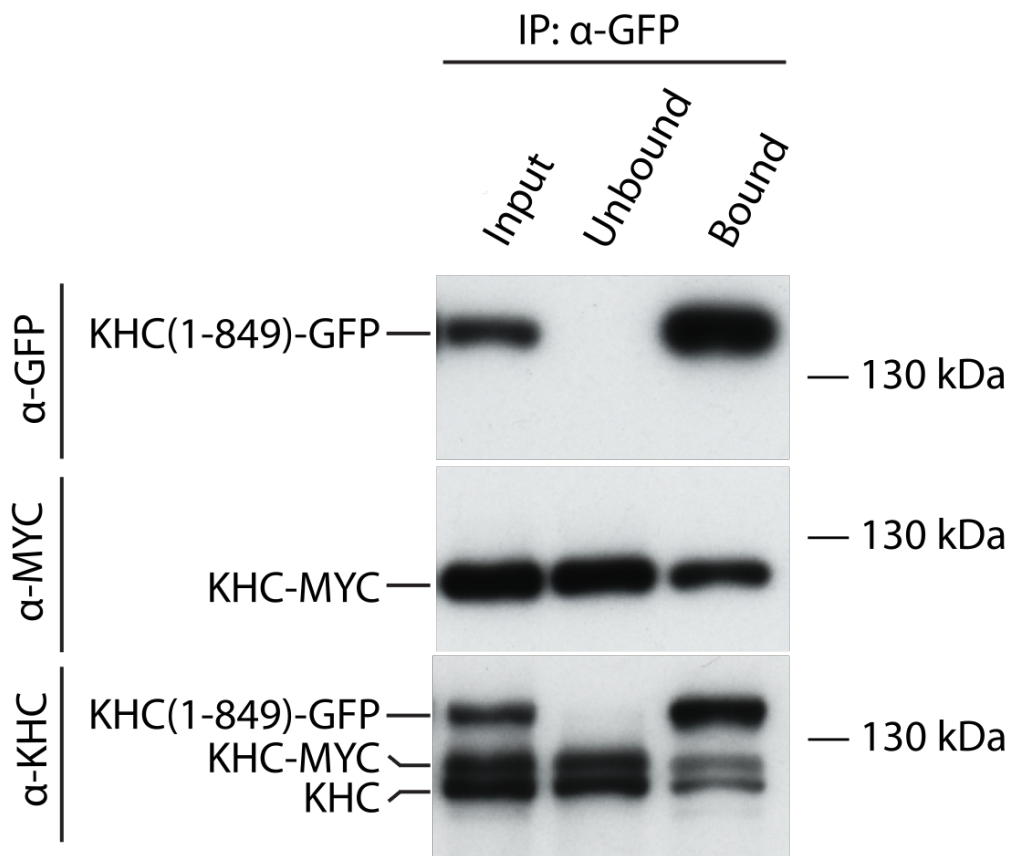

Supplement: supp_dev.048108_048108FigS4.pdf [file supp_dev.048108_048108FigS4.pdf]

### $\alpha$ -MYC IP

|                | Input                                                                              |   | Bound |   |
|----------------|------------------------------------------------------------------------------------|---|-------|---|
| KLC-MYC        | +                                                                                  | - | +     | - |
| Rab4-MYC       | -                                                                                  | + | -     | + |
| KHC(1-849)-GFP | +                                                                                  | + | +     | + |
| $\alpha$ - GFP |  |   |       |   |
|                | KHC-1-849 GFP                                                                      |   |       |   |

Supplement: supp_dev.048108_048108FigS5.pdf [file supp_dev.048108_048108FigS5.pdf]

**A**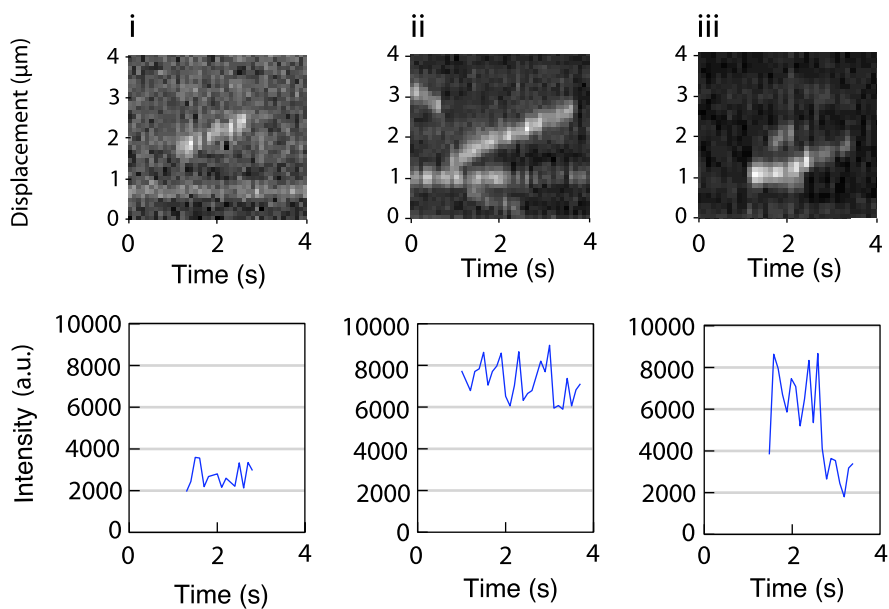**B**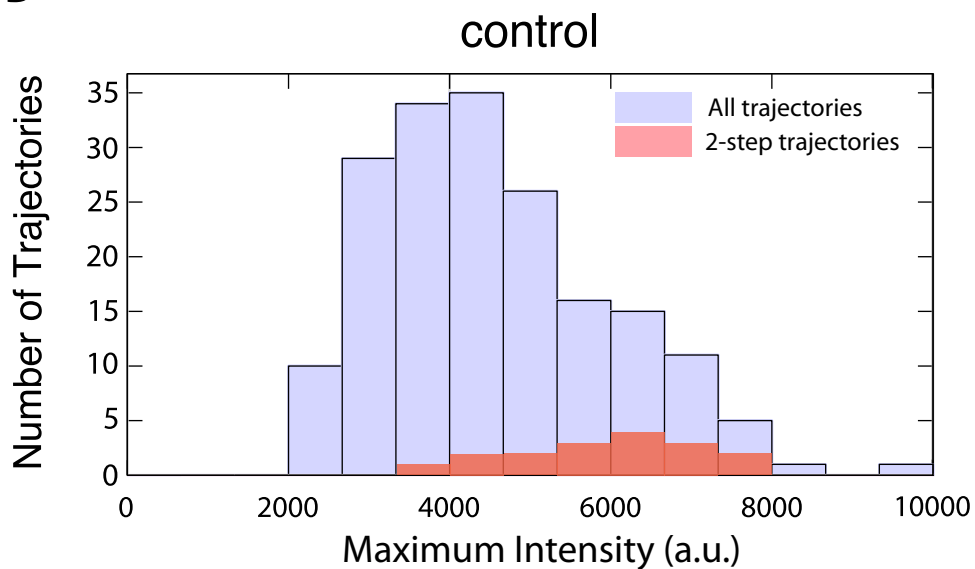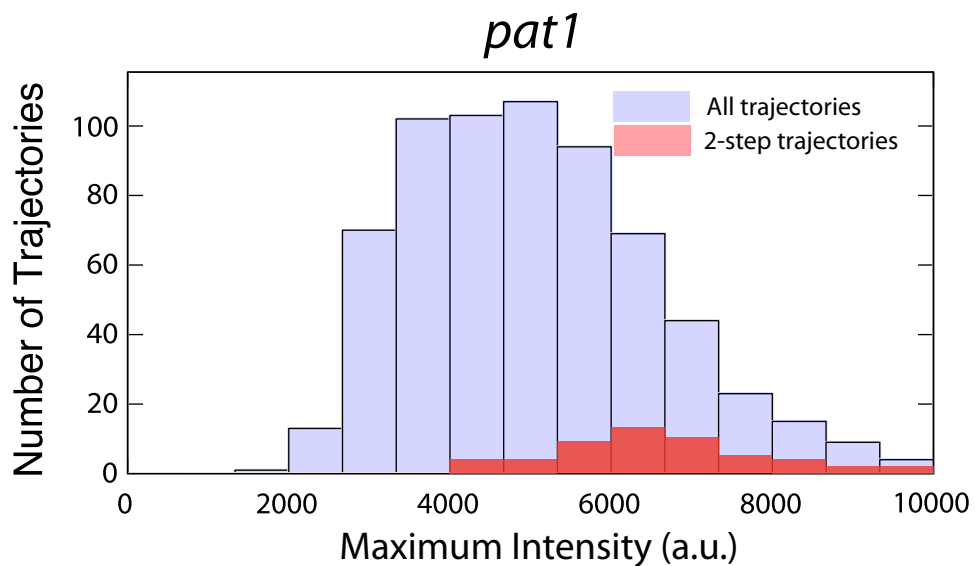

Supplement: supp_dev.048108_048108FigS7.pdf [file supp_dev.048108_048108FigS7.pdf]

Pat1-GFP DAPI

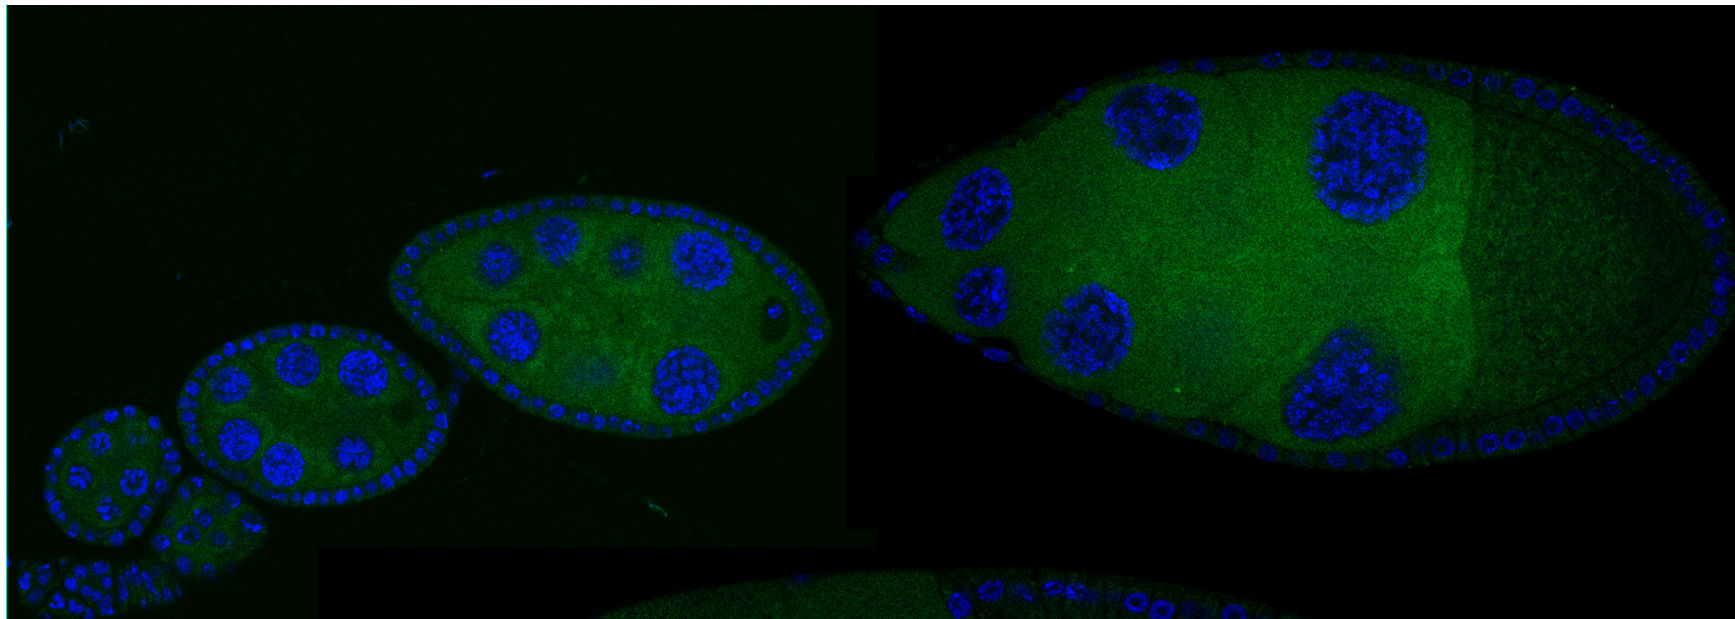

Supplement: supp_dev.048108_048108FigS9.pdf [file supp_dev.048108_048108FigS9.pdf]
